# Supplementary material for: Creatine Suppressed Colitis-Associated Colorectal Cancer in C57BL/6 Mice through Regulating M1/M2 Macrophage Polarization and Gut Microbial Homeostasis
Source: Research Square preprint supplement (doi:10.21203/rs.3.rs-6455731/v1), 2025-06-04
Supplement: Supplementary file 1 [file 8a9c4897a56940fbed3ed65f.pdf]

# **Creatine Suppressed Colitis-Associated Colorectal Cancer in C57BL/6 Mice through Regulating M1/M2 Macrophage Polarization and Gut Microbial Homeostasis**

## **Amino Acids**

Nianchen Liu<sup>1</sup>, Wanru Zhang<sup>1</sup>, Shuo Teng<sup>1</sup>, Tingting Ning<sup>1,2,\*</sup> and Jing Wu<sup>1,\*</sup>

<sup>1</sup> Department of Gastroenterology, Beijing Friendship Hospital, Capital Medical University, Beijing, 100050, China.

<sup>2</sup> National Clinical Research Center for Digestive Disease, Beijing Digestive Disease Center, State Key Laboratory of Digestive Health, Beijing, 100050, China.

\* Correspondence: ningtingting@mail.ccmu.edu.cn (T.N.), wujing36youyi@ccmu.edu.cn (J.W.)

(a)

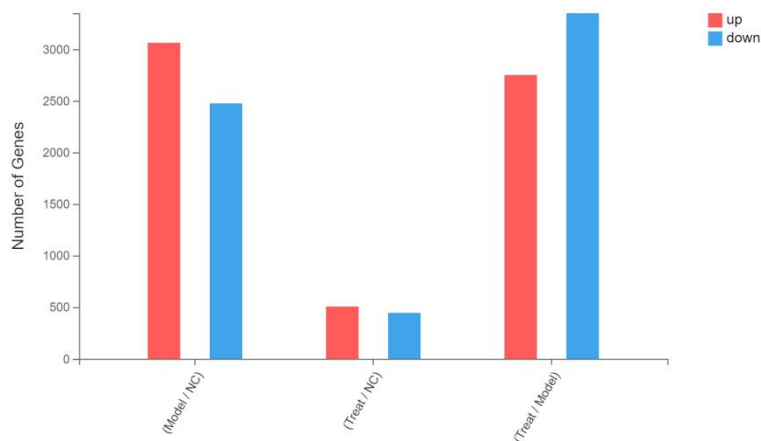

(b)

KEGG pathway(Model/ NC)

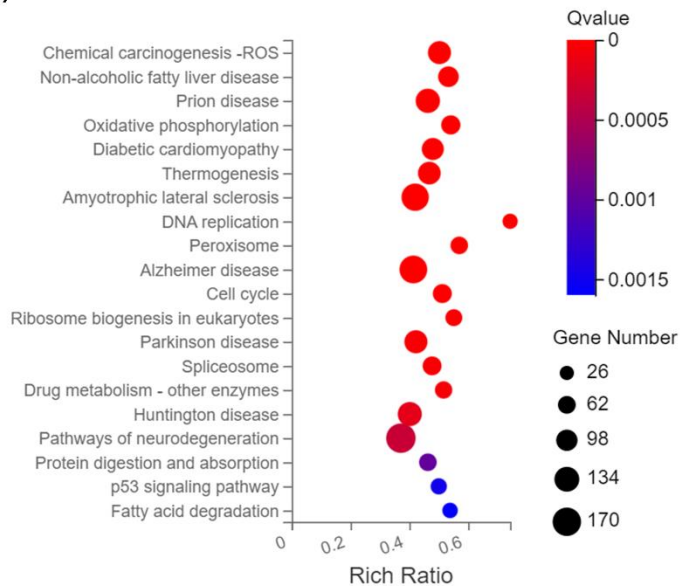

(c)

KEGG pathway(Treat/Model)

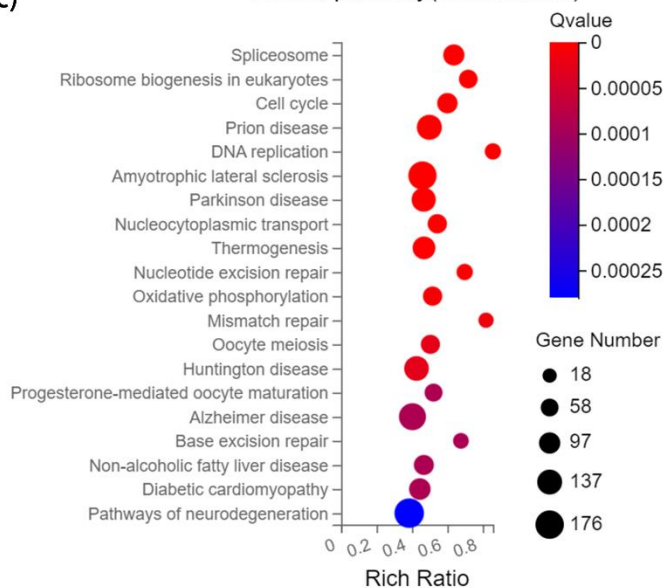

**Fig.S1** Supplementation with creatine affects macrophage polarization and TAMs-related KEGG pathways. (a) Numbers of DEGs. (b) KEGG pathway enrichment analysis among the model vs. NC groups. (c) KEGG pathway enrichment analysis among the treatment vs. NC groups.

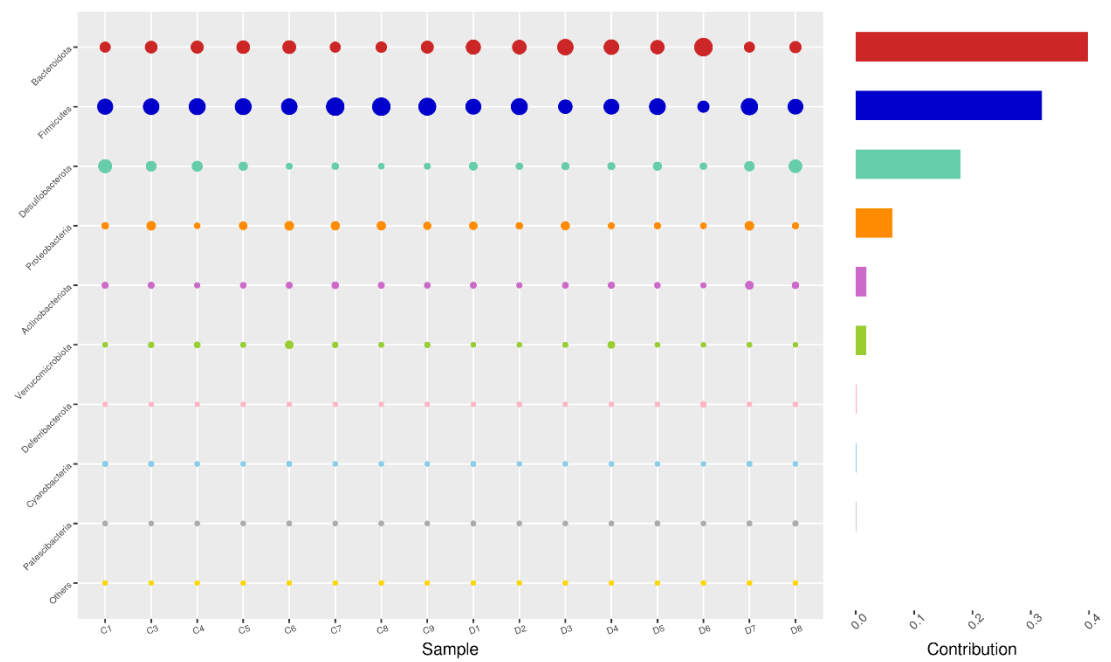

**Fig.S2** Simper analysis at the phylum level.
